# Supplementary material for: Heterogeneous antigenic properties of the porcine reproductive and respiratory syndrome virus nucleocapsid
Source: PubMed Central journal article supplement (PMC5118883; doi:10.1186/s13567-016-0399-9), 2016-11-21
Supplement: 13567_2016_399_MOESM1_ESM.pdf [file 13567_2016_399_MOESM1_ESM.pdf]

| Strain<br>(grey = complete genome) | Country of origin  | Collection date | Accession number<br>ORF5 | Accession number<br>ORF7 |
|------------------------------------|--------------------|-----------------|--------------------------|--------------------------|
| 2.96                               | Denmark?           | <1997           | AY035925                 | Z92532                   |
| 2234                               | Austria            |                 | AY875858                 | --                       |
| 2888                               | Austria            |                 | AY875855                 | --                       |
| 94881                              | USA                | 2006            | KT988004                 | KT988004                 |
| 01CB1                              | Thailand           | <2006           | DQ864705                 | DQ864705                 |
| 01RB1                              | Thailand           | 2001            | --                       | AY796316                 |
| 03RB1                              | Thailand           |                 | AY297124                 | --                       |
| 07V063                             | Belgium            | 2007            | GU737264                 | GU737264                 |
| 101125-5_415                       | Belarus            | 2010            | --                       | KC714005                 |
| 13V091                             | Belgium            | 2013            | KT159248                 | KT159248                 |
| 13V117                             | Belgium            | 2013            | ALO24147                 | ALO24147                 |
| 14432/2011                         | Hungary            | 2011            | ALH24924                 | ALH24924                 |
| 14WB                               | Slovakia           | 2011            | --                       | KF205271                 |
| 2029/97                            | Italy              | 1997            | AY035930                 | AY035973                 |
| 228 A                              | Denmark?           | <2001           | AY035909                 | AY035954                 |
| 2567/96                            | Italy              | 1996            | AY035932                 | AY035976                 |
| 28/2003                            | Spain              |                 | DQ345755                 | --                       |
| 28639/98                           | Denmark            | 1998            | AY035912                 | AY035957                 |
| 28M                                | Slovakia           | 2009            | --                       | JX046540                 |
| 2906/2                             | Austria            |                 | AY875862                 | --                       |
| 361-4                              | Denmark            | 1994            | AY035915                 | AY035960                 |
| 469-05                             | U.K.               | 2005            | JN86241                  | JF896255                 |
| 9625/2012                          | Hungary            | 2012            | KJ415276                 | KJ415276                 |
| A6991                              | Korea              | 2012            | KF360875                 | --                       |
| Akm-15A                            | Lithuania          | 2008            | --                       | KC714006                 |
| Amervac PRRS                       | Spain              | vaccine         | GU067771                 | GU067771                 |
| AN                                 | Belarus            | 2001            | --                       | EU071252                 |
| AS100908                           | Lithuania          | 2010            | --                       | KC714007                 |
| Aus                                | Lithuania          | 2000            | DQ324667                 | AF438362                 |
| AUT13-883                          | Austria            | 2013            | KT326148                 | KT326148                 |
| AUT14-440                          | Austria            | 2014            | KT334375                 | KT334375                 |
| AV30                               | ?                  | <1997           | AY035901                 | Z92708                   |
| Be1                                | U. K.              | 1993            | JN862385                 | L77914                   |
| Bel-1                              | Belarus            | 2010            | --                       | KC714008                 |
| Bel-2                              | Belarus            | 2010            | --                       | KC714009                 |
| Bel-42                             | Belarus            | 2004            | DQ324669                 | DQ324699                 |
| Ber                                | Lithuania          | 2007            | --                       | KC714010                 |
| Ber-14B                            | Lithuania          | 2005            | KC714025                 | KC714011                 |
| BH_95/10-08_EU                     | Germany            | 2002            | JN651737                 | JN651699                 |
| BH_95/10-12                        | Germany            | 2006            | JN651738                 | JN651700                 |
| BH_95/10-14                        | Germany            | 2008            | JN651740                 | JN651702                 |
| BJEU06-1                           | China              | 2006            | GU047344                 | GU047344                 |
| BK                                 | Russian Federation | 2006            | EU071231                 | EU071258                 |
| BLG                                | Russian Federation | 2006            | EU071232                 | EU071259                 |
| Bol-51                             | Belarus            |                 | --                       | KC714012                 |
| Bol-52                             | Belarus            |                 | --                       | KC714013                 |
| Bor-41                             | Belarus            | 2004            | DQ324671                 | DQ324701                 |
| Bor-55                             | Belarus            | 2009            | --                       | KC714014                 |

|                     |                    |       |          |          |
|---------------------|--------------------|-------|----------|----------|
| Bor-57              | Belarus            | 2009  | --       | KC714015 |
| Bor-59              | Belarus            | 2009  | --       | KC714016 |
| BR                  | Belarus            | 2001  | --       | EU071254 |
| BT-1                | Russian Federation | 2000  | --       | EU071302 |
| BT-2                | Russian Federation | 2006  | EU071247 | EU071303 |
| Che-46              | Poland             | 2005  | DQ324673 | DQ324703 |
| CP6874              | South Korea        |       | EF031042 | --       |
| CP8127              | South Korea        | <2006 | EF031043 | --       |
| CRESA 11            | Spain              |       | DQ009626 | --       |
| CRESA 13            | Spain              |       | DQ009637 | --       |
| CRESA 14            | Spain              | <2006 | DQ009638 | --       |
| CRESA 22            | Spain              |       | DQ009645 | --       |
| Cresa 2982          | spain              | 2005  | JF276430 | JF276430 |
| Cresa 3249          | spain              | 2005  | JF276433 | JF276433 |
| Cresa 3256          | spain              | 2005  | JF276432 | JF276432 |
| Cresa 3262          | spain              | 1992  | JF276431 | JF276431 |
| Cresa 3266          | Germany            | 1996  | JF276434 | JF276434 |
| Cresa 3267          | Portugal           | 2006  | JF276435 | JF276435 |
| CRESA 9             | Spain              |       | DQ009634 | --       |
| CResa-3004          | spain              | 1994  | GQ451669 | GQ451692 |
| Czy-1               | Belarus            | 2009  | --       | KC714017 |
| Czy-2               | Belarus            | 2009  | --       | KC713968 |
| DK-1992-PRRS-111_92 | Denmark            | 1992  | KC862566 | KC862566 |
| DK-2003-6-5         | Denmark            | 2003  | KC862571 | KC862571 |
| DK-2003-7-2         | Denmark            | 2003  | KC862572 | KC862572 |
| DK-2008-10-5-2      | Denmark            | 2008  | KC862573 | KC862573 |
| DK-2010-10-10-3     | Denmark            | 2010  | KC862568 | KC862568 |
| DK-2011-05-11-14    | Denmark            | 2011  | KC862567 | KC862567 |
| DK-2011-23-9        | Denmark            | 2011  | KC862569 | KC862569 |
| DK-2011-30-7-1      | Denmark            | 2011  | KC862513 | KC862544 |
| DK-2012-01-05-11    | Denmark            | 2012  | KC862518 | KC862548 |
| DK-2012-01-05-2     | Denmark            | 2012  | KC862574 | KC862574 |
| DK-2013-10-2-1      | Denmark            | 2013  | KC862524 | KC862551 |
| DK-2013-30-3-6      | Denmark            | 2013  | KC862525 | KC862552 |
| Dob                 | Poland             | 2007  | --       | EU071225 |
| DV                  | Netherlands        | 1996  | KF991509 | KF991509 |
| DZ                  | Russian Federation | 2000  | --       | EU071276 |
| Dzi-62              | Poland             | 2005  | DQ324675 | DQ324705 |
| E38                 | South korea        | 2007  | KT033457 | KT033457 |
| Eig                 | Lithuania          | 2006  | KC714026 | KC713968 |
| EuroPRRS            | USA                |       | AY366525 | AY366525 |
| FJEU13              | China              | <2015 | KP860912 | KP860912 |
| FJQEU14             | China              | <2015 | KP860913 | KP860913 |
| FR                  | Russian Federation | 2000  | --       | EU071260 |
| France 50-18        | France?            | <2000 | --       | AF297102 |
| GB-1                | Russian Federation | 1997  | --       | EU071261 |
| GB-2                | Russian Federation | 2000  | --       | EU071262 |
| GER09-613           | Germany            | 2009  | KT344816 | KT344816 |
| GK                  | Russian Federation | 2005  | EU071251 | EU071308 |
| GZ11-G1             | China              | 2011  | KF001144 | KF001144 |

|          |                    |       |          |          |
|----------|--------------------|-------|----------|----------|
| H-16-1a  | Germany            | 2004  | FJ705402 | --       |
| H3       | U.K.               | <1997 | JN862375 | L77916   |
| H-45-1a  | Germany            | 2005  | FJ705427 | --       |
| H-46-1a  | Germany            | 2004  | FJ705429 | --       |
| HK10     | Hong kong          | 2004  | KF287131 | KF287131 |
| HK3      | Hong kong          | 2003  | KF287129 | KF287129 |
| HK5      | Hong kong          | 2004  | KF287130 | KF287130 |
| HK8      | Hong kong          | 2004  | KF287128 | KF287128 |
| HKEU16   | Hong kong          | <2007 | EU076704 | EU076704 |
| HLJB1    | China              | 2014  | KT224385 | KT224385 |
| IL-1     | Russian Federation | 1997  | EU071240 | EU071277 |
| IL-2     | Russian Federation | 1999  | --       | EU071278 |
| Ili-11   | Russian Federation | 2009  | --       | KC713971 |
| Ili-13   | Russian Federation | 2009  | --       | KC713972 |
| Ili-3    | Russian Federation | 2009  | --       | KC713970 |
| Ili-p4   | Russian Federation | 2009  | --       | KC713973 |
| Ili-p8   | Russian Federation | 2009  | --       | KC713974 |
| IN       | Russian Federation | 2005  | EU071237 | EU071270 |
| IT15     | Italy              | 2004  | AY739971 | --       |
| IT19     | Italy              | 2002  | AY739975 | --       |
| IT42     | Italy              | 2003  | AY739998 | --       |
| IT62     | Italy              | 2003  | AY743932 | --       |
| IT7      | Italy              | 2004  | AY739963 | --       |
| IT8      | Italy              | 2004  | AY739964 | --       |
| IV3140   | South Korea        |       | DQ355821 | DQ355822 |
| IV1173   | Switzerland        | 2012  | KX622783 | KX622783 |
| K07-0604 | South Korea        | 2007  | JQ656013 | --       |
| K08-0317 | South Korea        | 2008  | JQ656028 | --       |
| K08-0439 | South Korea        | 2008  | JQ656050 | --       |
| K09-1351 | Korea              | 2009  | JQ656126 | --       |
| KH-1     | Russian Federation | 2004  | --       | EU071266 |
| KH-2     | Russian Federation | 2005  | EU071234 | EU071267 |
| KH-3     | Russian Federation | 2005  | EU071235 | EU071268 |
| KM       | Russian Federation | 1999  | --       | EU071265 |
| KNU-07   | South Korea        | 2007  | FJ349261 | FJ349261 |
| KR       | Russian Federation | 2000  | --       | EU071271 |
| Kre      | Lithuania          |       | KC714028 | KC713975 |
| KT       | Czech Republic     | 2006  | EU071226 | EU071224 |
| Kup      | Lithuania          | 2007  | KC714029 | KC713976 |
| KZ-1     | Russian Federation | 1999  | --       | EU071274 |
| KZ-2     | Russian Federation | 2004  | EU071239 | EU071275 |
| L51/2/92 | ?                  | <1997 | AY035937 | Z92531   |
| L56/2/91 | Spain              | 1991  | AY035935 | AY035979 |
| LA2      | Austria            | 2008  | KC522617 | AGT28447 |
| Lelystad | The Netherlands    | 1991  | M96262   | M96262   |
| Lena     | Belarus            | 2007  | JF802085 | JF802085 |
| LNEU12   | China              | 2012  | KM196101 | KM196101 |
| LV 4.2.1 | Netherlands        | <2004 | AY588319 | AY588319 |
| MB-1     | Russian Federation | 2004  | --       | EU071272 |
| MB-2     | Russian Federation | 2005  | EU071238 | EU071273 |

|                |                    |         |          |          |
|----------------|--------------------|---------|----------|----------|
| MG             | Belarus            | 1999    | --       | EU071255 |
| MG10           | Russian Federation | 2010    | --       | KC713977 |
| Mik            | Latvia             | 2008    | KC714030 | KC713978 |
| MLV-DV         | netherlands        | <1999   | KJ127878 | KJ127878 |
| MN             | Belarus            | 1999    | --       | EU071253 |
| MN-03-01_EU    | USA?               | <2004   | AY749377 | AY749378 |
| MN-03-05_EU    | USA?               | <2004   | AY749381 | AY749382 |
| Moz            | Belarus            | 2010    | --       | KC713979 |
| MT             | Russian Federation | 2009    | --       | KC713980 |
| NB             | Russian Federation | 2006    | EU071241 | EU071280 |
| ND-1           | Russian Federation | 1998    | EU071248 | EU071304 |
| ND-2           | Russian Federation | 1999    | --       | EU071305 |
| ND-3           | Russian Federation | 2006    | EU071249 | EU071306 |
| NE             | Russian Federation | 1999    | --       | EU071290 |
| netherlands 60 | Netherlands        | <2000   | --       | AF297100 |
| NK-1           | Russian Federation | 1999    | --       | EU071291 |
| NK-2           | Russian Federation | 2004    | --       | EU071292 |
| NL4.1          | ?                  | <1997   | --       | Z92534   |
| NMEU09-1       | China              | 2009    | GU047345 | GU047345 |
| NV-1           | Russian Federation | 1996    | --       | EU071281 |
| NV-2           | Russian Federation | 2004    | --       | EU071282 |
| NV-3           | Russian Federation | 2006    | EU071242 | EU071283 |
| NVDC-FJ        | China              | 2011    | KC492506 | KC492506 |
| NVDC-NM1-2011  | China              | 2011    | JX187609 | JX187609 |
| NVDC-NM2       | China              | 2011    | KC492504 | KC492504 |
| NVDC-NM3       | China              | 2011    | KC492505 | KC492505 |
| Obu-1          | Belarus            | 2005    | DQ324676 | DQ324707 |
| Okt            | Belarus            | 2010    | --       | KC713981 |
| Okt-35         | Belarus            | 2004    | DQ324677 | --       |
| Okt-46         | Belarus            | 2004    | --       | DQ324708 |
| Okt-47         | Belarus            | 2005    | --       | ABC74843 |
| Olot/91        | spain              | 1991    | KF203132 | KF203132 |
| OR             | Russian Federation | 2000    | --       | EU071284 |
| P7             | Czech Republic     | 2009    | --       | KF134439 |
| PK             | Belarus            | 2002    | EU071229 | --       |
| PMP            | Russian Federation | 2006    | EU071243 | EU071285 |
| PN             | Russian Federation | 2000    | --       | EU071286 |
| Pon            | Belarus            | 2010    | --       | KC713982 |
| Porcilis PRRS  | The Netherlands    | vaccine | DQ324678 | DQ324710 |
| Pov-5          | Belarus            | 2010    | --       | KC713983 |
| Pov-6          | Belarus            | 2010    | --       | KC713984 |
| PR             | Russian Federation | 1998    | --       | EU071287 |
| Prz            | Poland             | 2005    | DQ324680 | DQ324711 |
| Pyrsvac-187    | Spain              | vaccine | --       | DQ324712 |
| Raki-5         | Belarus            | 2010    | --       | KC713985 |
| Rom22          | Romania            |         | --       | JX134062 |
| Rom30          | Romania            | 2011    | --       | JX134070 |
| RS             | Russian Federation | 2005    | EU071230 | EU071257 |
| RV             | Russian Federation | 2003    | --       | EU071263 |
| RVB-581        | China              | 2006    | KX650082 | KX650082 |

|              |                    |       |          |          |
|--------------|--------------------|-------|----------|----------|
| SD01-08      | USA                | <2006 | DQ489311 | DQ489311 |
| Sel          | Latvia             | 2009  | KC714032 | KC713986 |
| SHE          | China              | <2008 | GQ461593 | GQ461593 |
| SHV          | Russian Federation | 2006  | EU071236 | EU071269 |
| Sid          | Lithuania          | 2000  | DQ324682 | AF438363 |
| Sig          | Latvia             | 2009  | KC714033 | --       |
| SL           | Russian Federation | 2010  | --       | KC713987 |
| SM           | Russian Federation | 1998  | --       | EU071288 |
| Sno-4        | Belarus            | 2004  | DQ324683 | DQ324713 |
| Sok-4        | Poland             | 2004  | DQ324684 | DQ324715 |
| Soz          | Belarus            | 2009  | --       | KC713988 |
| Soz(f2)      | Belarus            | 2006  | EU071227 | EU071222 |
| Soz(f3)      | Belarus            | 2006  | EU071228 | EU071223 |
| Soz-6        | Belarus            | 2004  | DQ324686 | DQ324719 |
| SP           | Russian Federation | 1999  | --       | EU071289 |
| Sp-16a       | Spain              | 2011  | JF730969 | --       |
| Sp-28a       | spain              | 2011  | JF730975 | --       |
| Sp-29a       | Spain              | 2011  | JF730976 | --       |
| Spain 4/1992 | spain              | 1992  | DQ345731 | --       |
| Stendal_V953 | Germany            | 1996  | JN651728 | JN651690 |
| strain II    | ?                  | <1997 | --       | Z92526   |
| strain V     | ?                  | <1997 | --       | Z92706   |
| SU1          | U.K.               | 1992  | JN862384 | JN862244 |
| Su1-bel      | Belarus            | 2010  | KP889243 | KP889243 |
| Svi          | Belarus            | 2010  | --       | KC713989 |
| Swi-1        | Belarus            | 2009  | --       | KC713990 |
| Swi-2        | Belarus            | 2009  | --       | KC713991 |
| Swi-3        | Belarus            | 2009  | --       | KC713992 |
| Sza          | Belarus            | 2010  | --       | KC713993 |
| TL           | Russian Federation | 1999  | --       | EU071296 |
| TM-1         | Russian Federation | 2000  | --       | EU071293 |
| TM-2         | Russian Federation | 2005  | EU071244 | EU071294 |
| TR           | Russian Federation | 2009  | --       | KC713994 |
| TT           | Russian Federation | 1998  | --       | EU071295 |
| Tur-1        | Belarus            | 2008  | --       | KC713995 |
| Tur-3        | Belarus            | 2008  | --       | KC713996 |
| UD           | Russian Federation | 2001  | --       | EU071298 |
| UKR-62       | Ukraine            | 2008  | --       | KC713997 |
| UKR-72       | Ukraine            | 2008  | --       | KC713998 |
| UIb-64       | Latvia             | 2009  | KC714036 | --       |
| UIb-7M       | Latvia             | 2009  | KC714035 | --       |
| V0812        | Korea              | 2008  | GQ847591 | GQ847617 |
| V1-6         | Russian Federation | 2010  | --       | KC713999 |
| V1-9         | Russian Federation | 2010  | --       | KC714000 |
| V-501        | Czech Republic     | 1996  | AF253531 | --       |
| Vas-2        | Belarus            | 2005  | DQ324689 | DQ324722 |
| VD           | Russian Federation | 1997  | --       | EU071279 |
| VL1          | Russian Federation | 2009  | --       | KC714001 |
| VL-1         | Russian Federation | 2001  | --       | EU071299 |
| VL2          | Russian Federation | 2010  | --       | KC714002 |

|           |                    |      |          |          |
|-----------|--------------------|------|----------|----------|
| VL-2      | Russian Federation | 2004 | --       | EU071300 |
| VL-3      | Russian Federation | 2006 | EU071246 | EU071301 |
| VL5       | Russian Federation | 2009 | --       | KC714003 |
| Vos-29    | Belarus            | 2004 | --       | DQ324725 |
| Vos-49    | Belarus            | 2004 | DQ324690 | --       |
| VR        | Russian Federation | 2005 | EU071233 | EU071264 |
| VR2332    | USA                | 1990 | EF536003 | EF536003 |
| VSH       | Russian Federation | 2005 | EU071250 | EU071307 |
| WB38      | Lithuania          |      | KC714037 | --       |
| WB39      | Lithuania          |      | KC714038 | --       |
| WB40      | Lithuania          |      | KC714039 | --       |
| WB41      | Lithuania          |      | KC714040 | --       |
| WB42      | Lithuania          |      | KC714041 | --       |
| WB58      | Lithuania          |      | KC714042 | --       |
| Yuz-34    | Belarus            | 2004 | DQ324692 | DQ324727 |
| Zad-1     | Belarus            | 2004 | DQ324694 | DQ324729 |
| Zap-36-40 | Belarus            | 2004 | DQ324696 | --       |
| Zap-41    | Belarus            | 2004 | --       | DQ324734 |
| ZD        | Belarus            | 2000 | --       | EU071256 |
| ZV        | Russian Federation | 2004 | EU071245 | EU071297 |
| Zve       | Belarus            | 2009 | --       | KC714004 |
