# Supplementary material for: Heterogeneous antigenic properties of the porcine reproductive and respiratory syndrome virus nucleocapsid
Source: PubMed Central journal article supplement (PMC5118883; doi:10.1186/s13567-016-0399-9), 2016-11-21
Supplement: 13567_2016_399_MOESM3_ESM.pdf [file 13567_2016_399_MOESM3_ESM.pdf]

### Additional file 3. Epitopes of the nucleocapsid protein N of PRRSV

| Strain                                | Position <sup>a)</sup>                                         | Epitope <sup>b)</sup>                                                                                        | References |                        |
|---------------------------------------|----------------------------------------------------------------|--------------------------------------------------------------------------------------------------------------|------------|------------------------|
| LV                                    | 2-12                                                           | AGKNQ <b>S</b> QKKKK                                                                                         | [33]       |                        |
|                                       |                                                                | AGKNQ <b>G</b> QKKKK                                                                                         |            |                        |
|                                       | 25-30                                                          | QLCQLL                                                                                                       |            |                        |
|                                       |                                                                | QLCQLL                                                                                                       |            |                        |
|                                       | 40-46                                                          | QPRGGQA                                                                                                      |            |                        |
|                                       |                                                                | QPRGGQA                                                                                                      |            |                        |
|                                       | 51-67 + 80-90♣                                                 | PEKPHFPLAAEDDIRHH + IQTAFNQGAG <b>T</b>                                                                      |            |                        |
|                                       |                                                                | PEKPHFPLAAEDDIRHH + IQTAFNQGAG <b>A</b>                                                                      |            |                        |
|                                       | 25-34                                                          | QLCQLLGAMI                                                                                                   |            | [29]                   |
|                                       |                                                                | QLCQLLGAMI                                                                                                   |            |                        |
|                                       | 31-40                                                          | GAMI <b>K</b> SQRQQ                                                                                          |            |                        |
|                                       |                                                                | GAMI <b>R</b> TQRQQ                                                                                          |            |                        |
|                                       | 46-55                                                          | AKKK <b>K</b> PEKPH                                                                                          |            |                        |
|                                       |                                                                | AKKK <b>R</b> PEKPH                                                                                          |            |                        |
|                                       | 44-71                                                          | GQAKKK <b>K</b> PEKPHFPLAAEDDIRHHLTQT                                                                        |            |                        |
| GQAKKK <b>R</b> PEKPHFPLAAEDDIRHHLTQT |                                                                |                                                                                                              |            |                        |
| 50-93                                 | <b>K</b> PEKPHFPLAAEDDIRHHLTQTERS LCLQSIQTAFNQGAG <b>T</b> ASL |                                                                                                              |            |                        |
|                                       | <b>R</b> PEKPHFPLAAEDDIRHHLTQTERS LCLQSIQTAFNQGAG <b>A</b> ASL |                                                                                                              |            |                        |
| 50-58♦                                | <b>K</b> PEKPHFPL                                              | [39]                                                                                                         |            |                        |
|                                       | <b>R</b> PEKPHFPL                                              |                                                                                                              |            |                        |
| 64-72♦                                | IRHHLTQTE                                                      |                                                                                                              |            |                        |
|                                       | IRHHLTQTE                                                      |                                                                                                              |            |                        |
| 105-113♦                              | FMLPVAHTV                                                      |                                                                                                              |            |                        |
|                                       | FMLPVAHTV                                                      |                                                                                                              |            |                        |
| 113-121♦                              | VRLIRVTST                                                      |                                                                                                              |            |                        |
|                                       | VRLIRVTST                                                      |                                                                                                              |            |                        |
| VR-2332                               | 21-48                                                          | QLCQMLGKIIAQQNQSRGKPGKKNKKK                                                                                  | [29]       |                        |
|                                       | 26-34                                                          | LGKIIAQQN                                                                                                    |            |                        |
|                                       | 30-57                                                          | IAQQNQSRGKPGKKNKKKNPEKPHFPL                                                                                  |            |                        |
|                                       | 36-46                                                          | SRGKPGKKNK                                                                                                   |            |                        |
|                                       | 42-50                                                          | GKKNKKKNP                                                                                                    |            |                        |
|                                       | 43-70                                                          | KKNKKKNPEKPHFPLATEDDVRHHFTPS                                                                                 |            |                        |
|                                       | 48-57                                                          | KNPEKPHFPL                                                                                                   |            |                        |
|                                       | 63-92                                                          | VRHHFTPSE RQLCLSSIQTAFNQGAGTCTL                                                                              |            |                        |
|                                       | 103-123                                                        | EFSLPTHHTVRLIRVTASPSA                                                                                        |            |                        |
|                                       | PA-8                                                           | 30-52♣                                                                                                       |            | IVQQNQSRGKPGKKNKKKNPEK |
| 37-57                                 |                                                                | RGKPGKKNKKKNPEKPHFLL                                                                                         |            |                        |
| 52-69                                 |                                                                | KPHFLLATEDDVRHHFTP                                                                                           |            |                        |
| 112-123♣                              |                                                                | VRLIRVTASPSA                                                                                                 |            |                        |
| Jxwn06                                | 49-57♦                                                         | <b>N</b> PEKPHFPL                                                                                            | [38]       |                        |
|                                       |                                                                | <b>R</b> PEKPHFPL                                                                                            |            |                        |
|                                       | 104-120♦                                                       | <b>F</b> SLP <b>T</b> QHTVRLIR <b>A</b> T <b>A</b> S<br><b>F</b> MLP <b>V</b> AHTVRLIR <b>V</b> T <b>S</b> T |            |                        |

<sup>a)</sup> SDOW17 epitopes are highlighted by the symbol ♣ whereas T cell epitopes are indicated by ♦

<sup>b)</sup> For the epitopes of LV and Jxwn06, the second row shows the corresponding sequence of IVI-1173 with the differences highlighted with red bold characters.
