# Supplementary material for: Heterogeneous antigenic properties of the porcine reproductive and respiratory syndrome virus nucleocapsid
Source: PubMed Central journal article supplement (PMC5118883; doi:10.1186/s13567-016-0399-9), 2016-11-21

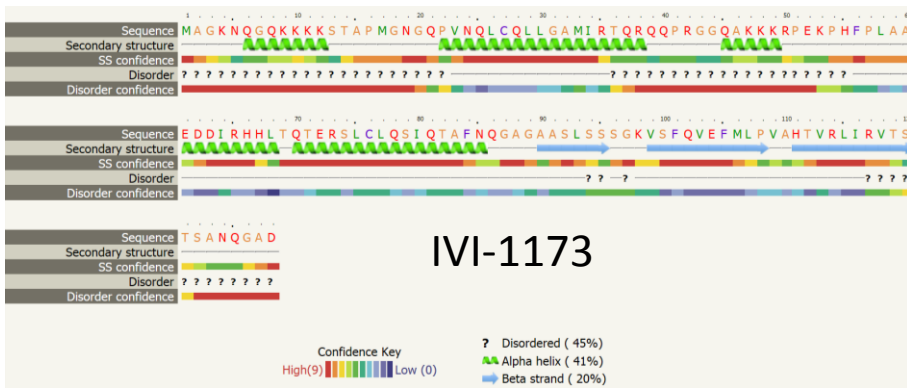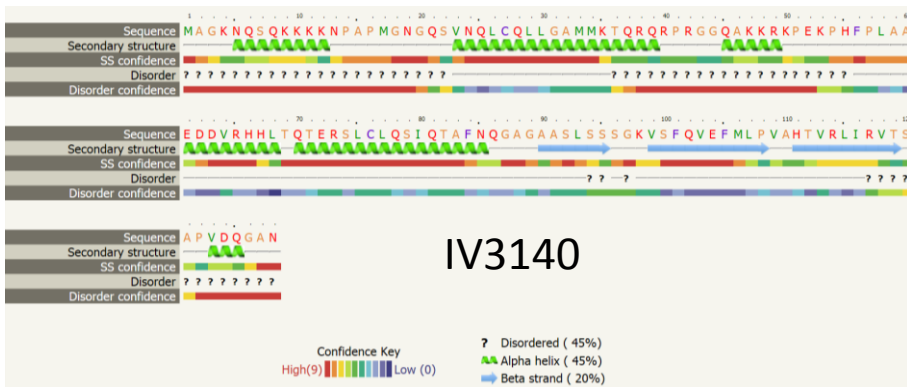

Supplement: 13567_2016_399_MOESM4_ESM.pdf [file 13567_2016_399_MOESM4_ESM.pdf]
